# Supplementary material for: ﻿Monograph of wild and cultivated chili peppers (Capsicum L., Solanaceae)
Source: PhytoKeys. 2022 Jun 14;200:1–423. doi: 10.3897/phytokeys.200.71667 (PMC9881532; doi:10.3897/phytokeys.200.71667)
Supplement: Supplementary material 3 — Appendix 3. Comparative data on distribution, habitat, biomes and number of ecoregions inhabited by Capsicum taxa [file phytokeys-200-001_article-71667__-s003.xls]

## Sheet: capsicum_biomes
Appendix 3. Comparative data on distribution, habitat, biomes and number of ecoregions inhabited by Capsicum taxa. Details of biomes and ecoregions are not applicable to domesticated taxa.
Species	Distribution	Habitat						Biomes					N.º ecoregion/s
			1	2	3	4	5	6	7	8	9	10				Biomes
C. annuum var. annuum	Cultivated across the Americas	Diverse habitats														1. Deserts & Xeric Shrublands
C. annuum var. glabriusculum	Southern United States of America to northern Bolivia and Brazil	Diverse habitats	X	X	X		X	X	X	X	X	X	99			2. Flooded Grasslands & Savannas
C. baccatum var. baccatum	South America	Dry and humid forests	X	X	X	X		X	X	X			27			3. Mangroves
C. baccatum var. pendulum	Cultivated; South America; introduced to Central and North America	Diverse habitats														4. Montane Grasslands & Shrublands
C. baccatum var. umbilicatum	Cultivated; Argentina, Brazil, Paraguay, Peru, Caribbean islands	Sporadic in wet habitats														5. Tropical & Subtropical Coniferous Forests
C. benoistii	Ecuador	Montane cloud forests								X			1			6. Tropical & Subtropical Dry Broadleaf Forests
C. caatingae	Brazil	Caatinga forests, rare in humid forests						X	X	X			4			7. Tropical & Subtropical Grasslands, Savannas & Shrubland
C. caballeroi	Bolivia	Montane cloud forests (Yungas and Bosque Tucumano-Boliviano Montano)						X		X			3			8. Tropical & Subtropical Moist Broadleaf Forests
C. campylopodium	Brazil	Atlantic forests								X			3			9. Temperate Grasslands, Savannas & Shrublands
C. carassense	Brazil	Atlantic forests								X			1			10. Temperate Broadleaf & Mixed Forests
C. cardenasii	Bolivia	Dry interandean valleys				X		X					3
C. ceratocalyx	Bolivia	Andean montane forest (Yungas)								X			1
C. chacoense	Bolivia, Paraguay, Argentina	Dry Chaco		X		X		X	X	X	X		14
C. chinense	Cultivated and weed; South America; introduced to Central and North America	Wet forests
C. coccineum	Bolivia, Brazil, Peru	Amazon Basin lowlands						X	X	X			10
C. cornutum	Brazil	Atlantic forests								X			2
C. dimorphum	Colombia, Ecuador, Peru	Andean premontane or montane forests								X			4
C. eshbaughii	Bolivia	Dry degraded marginal forests						X		X			3
C. eximium	Argentina, Bolivia	Dry or wet sub-Andean valleys				X		X	X	X			5
C. flexuosum	Argentina, Brazil, Paraguay	Primary and secondary wet forests	X	X					X	X			7
C. friburgense	Brazil	Atlantic forests								X			1
C. frutescens	Cultivated or weed; Central and South America	Tropical lowlands
C. galapagoense	Ecuador (Galápagos Archipelago)	Arid lowlands to moist uplands	X										1
C. geminifolium	Colombia, Ecuador, Peru	Andean to sub-Andean montane rain forests				X				X			9
C. hookerianum	Ecuador, Peru	Dry extra-Andean forests			X			X		X			5
C. hunzikerianum	Brazil	Atlantic forests								X			1
C. lanceolatum	Mexico, Guatemala, Honduras	Montane rain forests					X	X		X			11
C. longidentatum	Brazil	Caatinga forests						X		X			3
C. longifolium	Ecuador, Peru	Andean montane wet forests								X			2
C. lycianthoides	Colombia, Ecuador	Andean montane wet forests				X				X			6
C. minutiflorum	Bolivia	Chiquitano forest and transitional forests to the Yungas						X	X	X			3
C. mirabile	Brazil	Atlantic forests							X	X			5
C. mirum	Brazil	Atlantic forests								X			1
C. muticum	Brazil	Atlantic forests								X			1
C. neei	Bolivia	Boliviano-Tucumano forest						X		X			2
C. parvifolium	Brazil, Colombia, Venezuela	Caatinga forests and coastal areas						X	X	X			11
C. pereirae	Brazil	Atlantic forests							X	X			4
C. piuranum	Peru	Montane rain forests								X			1
C. pubescens	South America; introduced to Central and North America	Andean mid-elevations to highlands
C. rabenii	Brazil, Paraguay	Atlantic, Caatinga and Cerrado forests	X						X	X			8
C. recurvatum	Brazil	Atlantic forests								X			4
C. regale	Colombia, Ecuador, Peru	Amazonian premontane or montane humid forests								X			3
C. rhomboideum	Mexico to northern South America	Mostly dry forests	X					X		X			35
C. schottianum	Brazil	Atlantic forests							X	X			4
C. tovarii	Peru	Xerophytic to mesophytic Andean valleys								X			1
C. villosum	Brazil	Atlantic forests								X			4
